# Supplementary material for: A Portable Biosensor Based on Au Nanoflower Interface Combined with Electrochemical Immunochromatography for POC Detection of Prostate-Specific Antigen
Source: MDPI journal article supplement (doi:10.3390/bios12050259), 2022-04-19
Supplement: s1 [file s1]

Supplementary

# A Portable Biosensor Based on Au Nanoflower Interface Combined with Electrochemical Immunochromatography for POC Detection of Prostate-Specific Antigen

Yanzhi Dou <sup>1,2</sup>, Zhenhua Li <sup>1,2</sup>, Jing Su <sup>3</sup> and Shiping Song <sup>1,4,\*</sup>

<sup>1</sup> Division of Physical Biology, CAS Key Laboratory of Interfacial Physics and Technology, Shanghai Institute of Applied Physics, Chinese Academy of Sciences, Shanghai 201800, China; douyanzhi@sinap.ac.cn (Y.D.); lzh@sinap.ac.cn (Z.L.)

<sup>2</sup> University of Chinese Academy of Sciences, Beijing 100049, China

<sup>3</sup> State Key Laboratory of Oncogenes and Related Genes, Institute for Personalized Medicine, School of Biomedical Engineering, Shanghai Jiao Tong University, Shanghai 200030, China; sujing@sjtu.edu.cn

<sup>4</sup> The Interdisciplinary Research Center, Shanghai Synchrotron Radiation Facility, Zhangjiang Laboratory, Shanghai Advanced Research Institute, Chinese Academy of Sciences, Shanghai 201210, China

\* Correspondence: songshiping@sinap.ac.cn

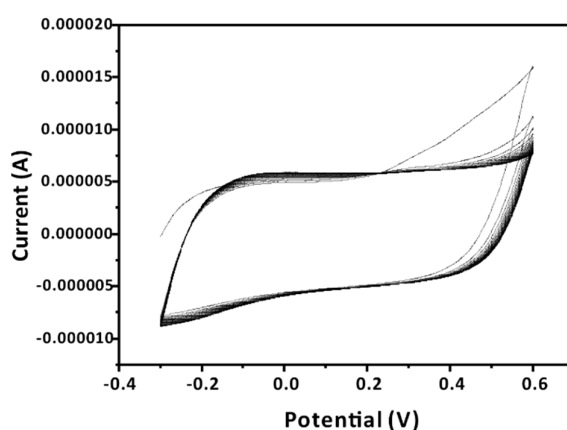

Figure S1. CV curve of SPCE cleaning.

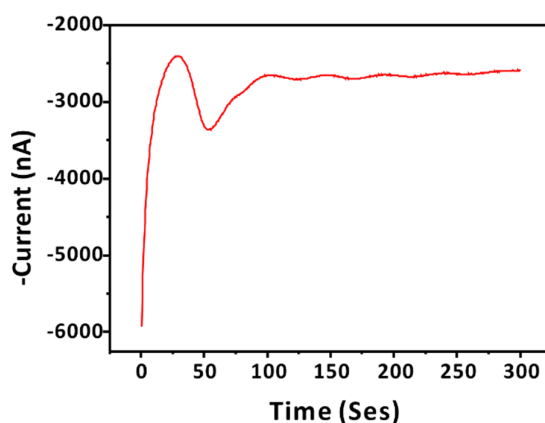

Figure S2. i-t curve of electrochemically deposited Au NFs on the SPCE.
